# Supplementary material for: Density and diversity of macroinvertebrates in Colombian Andean streams impacted by mining, agriculture and cattle production
Source: PeerJ. 2020 Sep 16;8:e9619. doi: 10.7717/peerj.9619 (PMC7501782; doi:10.7717/peerj.9619)
Supplement: Table S3 [file peerj-08-9619-s003.xlsx]

## Sheet: Hoja1
Tabla S3. Abundance for each RTUs, sampling zone, and sampling dates.
Order	Family	Genera	Reference 1						Reference 2						Cattle production						Agriculture						Mining						Total abundance
			2014-02-12	2014-04-01	2014-07-08	2014-09-09	2014-11-04	2015-02-10	2014-02-12	2014-04-01	2014-07-08	2014-09-09	2014-11-04	2015-02-10	2014-02-12	2014-04-01	2014-07-08	2014-09-09	2014-11-04	2015-02-10	2014-02-12	2014-04-01	2014-07-08	2014-09-09	2014-11-04	2015-02-10	2014-02-12	2014-04-01	2014-07-08	2014-09-09	2014-11-04	2015-02-10
Amphipoda		Hyalella	0	0	1	0	1	1	0	0	0	0	1	0	8	6	11	16	37	60	0	0	0	0	0	0	0	0	0	0	1	0	143
Arhynchobdellida	Hirudinidae	H1	0	0	0	0	1	0	0	0	0	0	0	0	0	0	0	0	0	0	0	0	0	0	0	0	0	0	0	0	0	0	1
Coleoptera	Dryopidae	Dr1	0	0	0	0	0	0	1	0	1	0	0	0	0	0	0	0	0	0	0	0	0	0	0	0	0	0	0	0	0	0	2
	Dytiscidae	Dy1	0	0	0	0	0	0	0	0	0	0	0	0	0	0	0	0	0	0	0	0	0	1	0	0	0	1	0	1	0	0	3
	Elmidae	Austrolimnius	0	0	0	0	0	0	0	1	0	0	0	0	0	0	0	0	0	0	0	0	0	0	0	0	0	0	0	0	0	0	1
		Cylloepus	0	0	0	1	0	0	2	6	3	3	0	2	0	0	0	0	2	0	1	0	0	0	0	0	0	0	0	2	1	0	23
		Disersus	0	0	0	0	0	0	0	0	0	0	0	0	0	0	0	0	0	0	0	0	0	0	0	0	1	0	0	0	0	0	1
		Heterelmis	1	1	0	0	0	1	0	2	3	4	4	0	3	14	11	13	24	23	0	0	0	0	0	0	0	0	1	0	0	1	106
		Macrelmis	0	0	0	2	0	0	0	0	2	0	2	6	0	0	0	0	0	0	0	0	0	0	0	0	0	1	0	0	0	0	13
		Neoelmis	0	0	0	0	0	0	0	0	0	0	0	0	0	0	0	0	0	0	0	0	0	0	0	0	0	1	0	0	0	0	1
		Pharceonus	0	0	0	0	0	0	0	0	0	0	0	0	0	0	0	0	0	2	0	0	0	0	0	0	0	0	0	0	0	0	2
	Hydrophilidae	Hydrophilus	0	0	0	0	0	0	0	0	0	0	0	0	0	0	0	1	0	0	0	0	0	0	0	0	0	0	0	0	0	0	1
	Ptilodactylidae	Anchytarsus	1	1	12	44	30	28	21	12	8	6	16	19	19	5	8	15	42	33	1	3	0	0	0	0	0	3	12	25	4	5	373
	Scirtidae	Sc1	20	13	14	15	28	16	0	0	0	0	0	0	3	11	0	4	2	2	0	0	0	0	0	0	0	1	0	0	0	0	129
Decapoda	Pseudothelphusidae	Strengeriana	0	0	0	0	0	0	0	0	0	0	1	0	0	0	0	0	0	0	0	0	1	0	2	1	0	0	0	0	0	0	5
Diptera	Blephariceridae	Limonicola	3	1	2	3	2	2	0	0	0	0	0	0	2	0	0	0	0	0	0	0	0	0	0	0	0	0	2	6	0	1	24
		Paltostoma	0	0	0	0	0	0	0	0	0	0	0	0	0	5	0	0	0	0	0	0	0	0	0	0	0	0	0	0	0	0	5
	Ceratopogonidae	Bezzia	0	2	0	0	3	2	0	0	0	0	0	0	0	0	0	0	0	0	0	0	0	0	0	0	0	0	0	1	2	0	10
	Chironomidae- Subfamily Chironominae	Ch1	0	8	0	1	1	0	19	5	133	37	11	63	0	3	6	29	1	2	2	0	0	0	0	0	0	5	0	3	0	2	331
		Polypedilum	0	0	0	0	0	0	0	0	0	0	0	0	0	0	0	0	0	0	0	0	0	0	0	0	0	0	0	3	0	0	3
		Riethia	1	0	0	0	0	0	0	0	0	0	0	0	0	0	0	0	0	0	0	0	0	0	0	0	0	0	0	0	0	0	1
	Chironomidae-Subfamily Tanypodinae	Tany1	0	0	0	0	0	0	1	0	13	26	3	10	0	0	0	0	0	0	1	0	0	0	0	0	0	0	0	0	0	1	55
	Chironomidae-Subfamily Orthocladiinae	Oth1	12	16	14	22	8	3	119	11	26	37	10	125	7	4	2	5	2	11	0	0	1	1	1	2	101	35	101	22	2	10	710
	Chironomidae-Subfamily Podonominae	Podonomus	1	9	0	0	0	0	0	0	0	0	0	0	0	1	1	0	0	0	0	0	0	0	0	0	0	0	0	0	0	0	12
	Dixidae	Dix1	0	0	0	0	0	0	0	0	0	0	0	1	0	1	1	0	0	0	0	0	0	0	0	0	0	0	0	0	0	0	3
	Dolichopodidae	Dol1	0	0	0	0	0	0	0	0	0	1	0	1	0	0	0	0	0	0	0	0	0	0	0	0	1	0	0	0	0	0	3
	Empididae	Em1	0	0	0	1	0	0	0	0	0	0	1	4	0	0	0	0	0	0	0	0	0	0	0	0	1	0	12	6	0	0	25
	Muscidae	Limnophora	0	0	0	1	0	0	0	0	0	0	2	0	0	0	0	0	1	0	0	0	0	0	0	0	0	0	3	1	2	2	12
	Simuliidae	Gigantodax	0	0	2	0	1	0	0	0	0	0	0	0	0	0	4	0	0	0	0	0	0	0	0	0	0	0	0	1	0	1	9
		Simulium	0	0	1	3	0	1	29	26	5	8	1	8	6	14	13	16	21	12	463	8	168	2	6	39	0	1	0	0	0	0	851
	Tipulidae	Hexatoma	1	0	0	0	1	0	1	0	0	0	3	0	1	0	0	0	1	2	0	0	0	0	0	0	1	0	2	1	0	1	15
		Limonia	1	0	0	0	0	0	0	0	0	0	0	0	0	0	0	0	0	0	0	0	0	0	0	0	1	0	0	0	1	0	3
		Molophilus	1	0	1	0	0	0	2	0	2	3	0	1	0	0	0	0	0	0	1	0	0	0	0	0	0	0	0	0	0	0	11
		Tipula	1	0	1	2	13	4	1	1	4	10	2	7	1	0	1	1	2	0	3	2	1	3	1	3	1	4	1	5	3	2	80
Ephemeroptera	Baetidae	Andesiops	75	26	33	64	67	42	6	1	1	22	6	10	0	86	57	11	29	83	0	0	0	0	0	0	4	10	18	41	75	15	782
		Baetodes	46	26	182	101	133	112	26	100	249	52	15	16	22	30	106	8	19	68	0	1	0	0	0	0	51	1	151	291	76	60	1942
		Camelobaetidius	0	0	0	0	0	0	0	0	2	0	0	0	71	0	0	0	0	0	0	0	0	0	0	0	0	0	1	0	0	0	74
		Mayobaetis	10	5	3	1	4	1	0	0	3	3	0	0	0	1	6	0	0	0	0	0	0	0	0	0	3	0	3	3	1	4	51
		Nanomis	10	0	0	0	1	0	0	0	41	2	0	0	0	0	0	0	0	0	0	0	0	0	0	0	1	0	0	0	0	0	55
		Paracloeodes	0	0	0	0	0	0	0	0	5	0	0	0	0	0	0	0	0	0	0	0	0	0	0	0	0	0	0	0	0	0	5
		Prebaetodes	0	0	0	1	0	0	3	5	0	0	1	0	0	0	0	0	3	1	0	0	0	0	0	0	0	0	0	0	0	0	14
		Varipes	0	0	0	0	0	0	0	0	10	0	1	0	0	0	0	0	0	0	0	0	0	0	0	0	0	0	0	0	0	0	11
	Leptohyphidae	Leptohyphes	0	0	0	0	0	0	3	0	3	8	16	4	8	1	0	1	5	3	0	0	0	0	0	0	1	0	0	0	0	0	53
		Tricorythodes	0	0	0	0	0	0	1	0	1	2	5	3	0	0	0	0	0	0	0	0	0	0	0	0	0	0	0	0	0	0	12
	Leptophlebiidae	Farrodes	0	0	0	0	0	0	0	0	1	0	0	0	0	0	0	0	0	0	0	0	0	0	0	0	0	0	0	0	0	0	1
		Thraulodes	0	0	0	0	0	0	0	0	3	5	3	9	0	0	0	0	0	0	0	0	0	0	0	0	0	0	0	0	0	0	20
Hemiptera	Veliidae	Paravelia	0	0	0	0	0	0	0	0	0	0	0	0	0	0	0	0	0	0	0	0	0	1	0	0	0	0	0	0	0	0	1
		Rhagovelia	0	0	0	0	1	0	1	0	15	12	4	0	0	0	0	0	0	0	3	6	1	63	4	1	0	0	0	0	0	0	111
Lepidoptera	Pyralidae	Cryl1	0	0	0	0	0	0	0	0	1	0	0	0	0	0	0	0	0	0	0	0	0	0	0	0	0	0	0	0	0	0	1
Megaloptera	Corydalidae	Corydalus	0	0	0	0	0	0	0	1	1	0	1	0	0	0	0	0	0	0	0	0	0	0	0	0	0	0	0	0	0	0	3
Odonata	Calopterygidae	Calo1	0	0	0	0	0	0	1	0	1	0	1	0	0	0	0	0	0	0	3	7	3	3	1	5	0	0	0	0	0	0	25
	Libellulidae	Libe1	0	0	0	0	0	0	0	0	2	7	7	2	1	0	0	0	0	0	1	1	0	0	0	1	0	0	0	0	0	0	22
Plecoptera	Perlidae	Anacroneuria	1	0	0	0	1	0	0	0	0	1	0	0	0	0	7	3	2	1	0	0	0	0	0	0	0	0	0	0	0	0	16
Trichoptera	Calamoceratidae	Phylloicus	1	0	0	0	0	0	0	0	0	0	0	0	0	0	0	0	0	0	0	0	0	0	0	0	0	0	0	0	0	0	1
	Glossosomatidae	Culoptila	0	0	1	3	1	0	0	0	1	2	1	1	7	6	12	2	0	0	0	0	0	0	0	0	1	0	0	0	0	0	38
		Mortoniella	0	0	0	0	0	0	0	0	0	0	0	0	2	0	0	0	0	0	0	0	0	0	0	0	0	0	0	0	0	0	2
	Helicopsychidae	Helicopsyche	1	0	0	0	0	0	0	0	48	79	3	23	0	0	0	0	0	0	0	0	0	0	0	0	0	0	0	0	0	0	154
	Hydrobiosidae	Atopsyche	14	7	15	48	40	15	2	1	22	18	6	1	14	9	14	3	4	11	0	0	0	0	0	0	13	3	27	24	12	8	331
	Hydropsychidae	Leptonema	0	0	0	0	0	0	1	0	0	0	3	2	0	0	0	0	0	0	0	0	0	0	0	0	0	0	0	0	0	0	6
		Smicridea	0	5	1	2	1	1	25	18	72	153	101	29	19	6	18	1	10	8	3	1	1	0	8	10	3	0	0	2	0	0	498
	Hydroptilidae	Hydroptila	0	0	0	0	0	0	0	0	0	0	0	0	1	0	0	0	0	0	0	0	0	0	0	0	2	0	0	0	0	0	3
		Metrichia	0	0	0	0	0	0	0	0	0	0	0	2	0	0	0	0	0	0	0	0	0	0	0	0	0	0	0	0	0	0	2
	Leptoceridae	Atanatolica	0	0	0	0	0	0	0	0	0	0	0	0	0	0	0	0	0	0	0	0	0	0	0	0	1	0	0	0	0	0	1
		Nectopsyche	1	0	1	1	1	0	0	0	0	1	0	0	1	0	0	2	1	0	0	0	0	0	0	0	0	0	1	0	0	0	10
		Oecetis	0	0	0	0	0	0	0	0	0	0	0	0	0	0	0	0	0	0	0	0	0	1	0	0	0	0	0	0	0	0	1
		Triplectides	0	0	0	0	0	0	0	0	0	0	0	1	0	0	0	0	0	0	0	0	0	0	0	0	0	0	0	0	0	0	1
	Odontoceridae	Marilia	0	0	0	0	0	0	0	0	0	5	1	0	0	0	0	0	0	0	0	0	0	0	0	0	0	0	0	0	0	0	6
	Philopotamidae	Chimarra	0	0	0	0	0	0	0	0	0	0	2	0	1	0	0	0	0	0	3	2	9	1	4	0	0	0	0	0	0	0	22
	Polycentropodidae	Polyplectropus	0	0	1	0	0	0	0	0	0	0	0	0	0	0	0	0	0	0	0	0	0	0	0	0	0	0	0	0	0	0	1
Tricladida	Planariidae	Dugesia	0	0	0	1	0	0	0	0	0	2	1	2	1	1	2	1	15	4	67	18	25	32	15	21	0	0	0	0	1	0	209
Tubificada	Naididae	Nai1	0	1	0	2	5	6	0	0	0	0	0	0	0	0	0	1	2	0	2	0	2	0	2	2	0	0	1	2	0	3	31
Abundance			202	121	285	319	344	235	265	190	682	509	235	352	198	204	280	133	225	326	554	49	212	108	44	85	187	66	336	440	181	116	7483
